# Supplementary material
Source: MDPI journal article supplement (https://www.mdpi.com/2076-3417/12/14/6845)

### Flavonoids – aerial parts

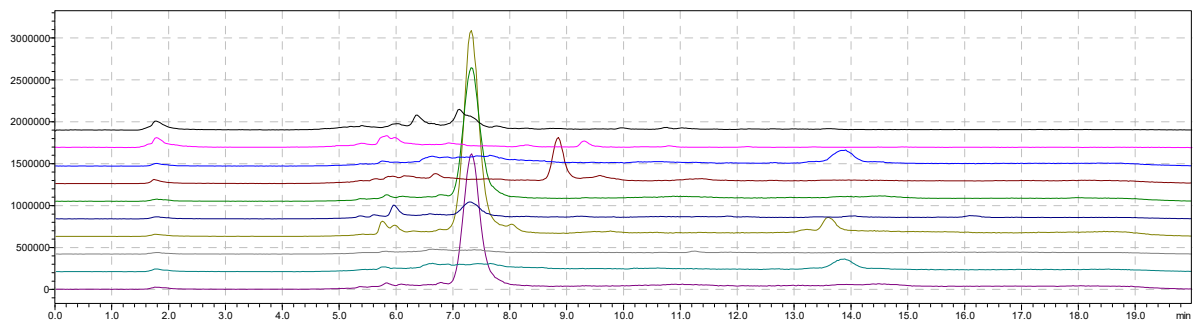

### Flavonoids roots

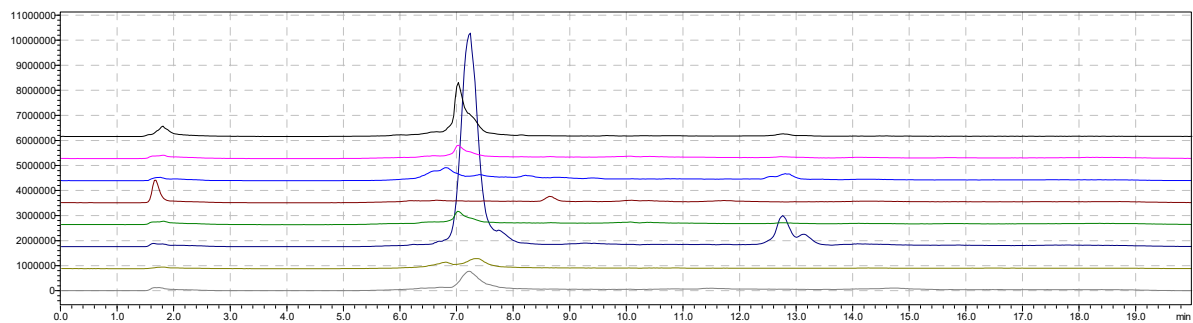

### Steroidal glycosides, steroidal glycoalkaloids and steroidal alkaloids – aerial parts

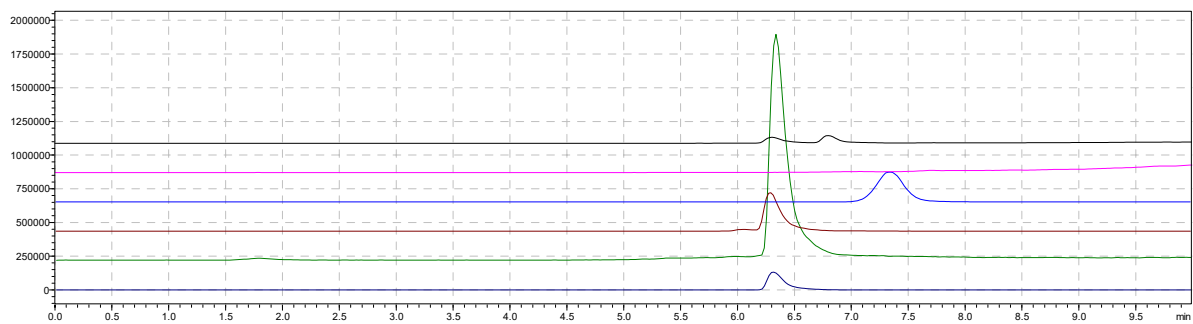

### Steroidal glycosides, steroidal glycoalkaloids and steroidal alkaloids – roots

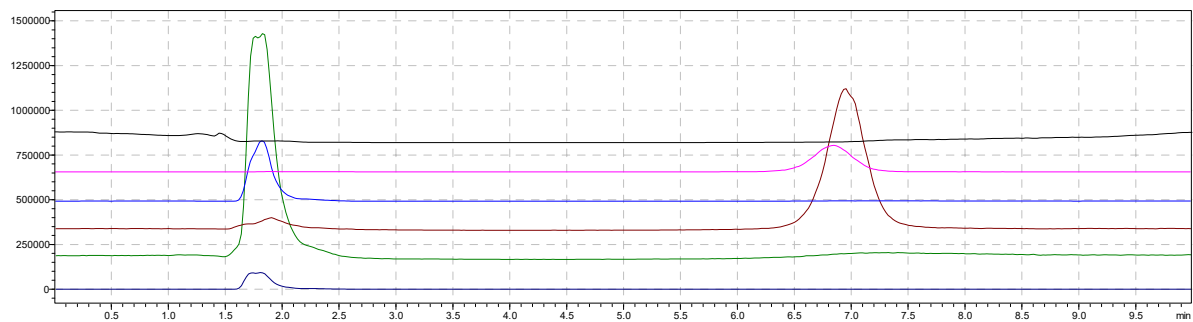

Supplement: s1 [file s1]
